1 **Protective Transfer: Maternal passive immunization with a rotavirus-neutralizing**  
2 **dimeric IgA protects against rotavirus disease in suckling neonates**

3 Langel SN<sup>1,2</sup>, Steppe JT<sup>3</sup>, Chang J<sup>3</sup>, Travieso T<sup>3</sup>, Webster H<sup>3</sup>, Otero CE<sup>3,4</sup>, Williamson  
4 LE<sup>5,6,7</sup>, Crowe JE Jr<sup>5,6,7</sup>, Greenberg HB<sup>8</sup>, Wu H<sup>9</sup>, Hornik C<sup>9,10</sup>, Mansouri K<sup>3</sup>, Edwards  
5 RJ<sup>3,11</sup>, Stalls V<sup>3</sup>, Acharya P<sup>2,3</sup>, Blasi M<sup>3,11\*</sup>, Permar SR<sup>12\*</sup>

6 <sup>1</sup>Duke Center for Human Systems Immunology, Durham, NC, USA

7 <sup>2</sup>Department of Surgery, Duke University School of Medicine, Durham, NC, USA

8 <sup>3</sup>Duke Human Vaccine Institute, Duke University School of Medicine, Durham, NC, USA

9 <sup>4</sup>Department of Pathology, Duke University School of Medicine, Durham, NC, USA

10 <sup>5</sup>Vanderbilt Vaccine Center, Vanderbilt University Medical Center, Nashville, TN, USA

11 <sup>6</sup>Department of Pathology, Microbiology and Immunology, Vanderbilt University Medical  
12 Center, Nashville, TN, USA

13 <sup>7</sup>Department of Pediatrics, Vanderbilt University Medical Center, Vanderbilt, TN, USA

14 <sup>8</sup>Departments of Medicine and Microbiology and Immunology, Stanford University School  
15 of Medicine, Stanford CA, USA. and the VA Palo Alto Health Care System, Department  
16 of Veterans Affairs, Palo Alto, CA, USA

17 <sup>9</sup>Department of Pediatrics, Duke University School of Medicine, Durham, NC, USA

18 <sup>10</sup>Duke Clinical Research Institute, Duke University School of Medicine, Durham, NC,  
19 USA

20 <sup>11</sup>Department of Medicine, Duke University School of Medicine, Durham, NC, USA

21 <sup>12</sup>Department of Pediatrics, Weill Cornell Medical College, NYC, NY USA

22

23 \*Correspondence should be addressed to: Maria Blasi, Duke University Medical Center,  
24 2 Genome Ct, 27710 Durham, NC, USA. E-mail: [maria.blasi@duke.edu](mailto:maria.blasi@duke.edu) and Sallie  
25 Permar, Weill Cornell Medicine/NewYork Presbyterian Hospital E-mail:  
26 [sallie.permar@med.cornell.edu](mailto:sallie.permar@med.cornell.edu)

27

28

## 29 GRAPHICAL ABSTRACT

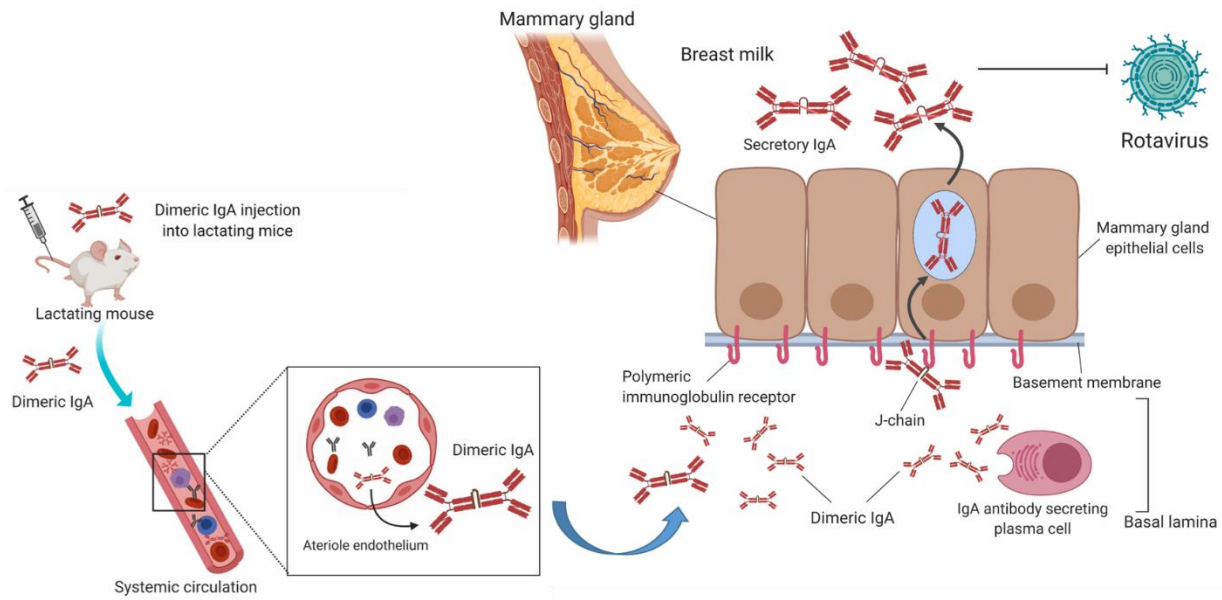

30

31 **SUMMARY**

32 Breast milk secretory IgA antibodies provide a first line of defense against enteric  
33 infections. Despite this and an effective vaccine, human rotaviruses (RVs) remain the  
34 leading cause of severe infectious diarrhea in children in low- and middle-income  
35 countries (LMIC) where vaccine efficacy is lower than that of developed nations.  
36 Therapeutic strategies that deliver potently neutralizing antibodies into milk could  
37 provide protection against enteric pathogens such as RVs. We developed a murine  
38 model of maternal protective-transfer using systemic administration of a dimeric IgA  
39 (dIgA) monoclonal antibody. We confirmed that systemically-administered dIgA  
40 passively transferred into milk and stomach of suckling pups in a dose-dependent  
41 manner. We then demonstrated that systemic administration of an engineered potent  
42 RV-neutralizing dIgA (mAb41) in lactating dams protected suckling pups from RV-  
43 induced diarrhea. This maternal protective-transfer immunization platform could be an  
44 effective strategy to improve infant mortality against enteric infections, particularly in  
45 LMIC with high rates of breastfeeding.

46

## 47 INTRODUCTION

48 Rotavirus (RV), a common enteric pathogen, is responsible for ~125,000-215,000  
49 deaths in children <5 years and is the leading cause of gastroenteris-related  
50 hospitalizations worldwide, particularly in low and middle-income countries (LMIC)  
51 (Burke et al., 2019). While oral live, attenuated RV vaccines have significantly reduced  
52 RV-associated disease and death worldwide (Burnett et al., 2017), RV vaccines  
53 demonstrate lower efficacy in children in LMIC (40-60%) compared to those in high-  
54 income countries (80-90%) (Jonesteller et al., 2017; Mwila et al., 2017). The  
55 combination of decreased RV vaccine efficacy, high rates of RV exposure and an  
56 immature immune system creates a 'window of susceptibility' when infants and toddlers  
57 are particularly vulnerable. Strategies to provide additional antibody-mediated protection  
58 are needed to narrow this critical window of vulnerability and further decrease RV-  
59 associated disease and death.

60 While maternal immunization could be employed as a strategy to boost protective  
61 antibodies in breast milk, pregnant women in areas with high RV-associated morbidity  
62 and mortality experience undernutrition (Desyibelew and Dadi, 2019), micronutrient  
63 deficiencies (Harika et al., 2017) and chronic enteropathies that may impact generation  
64 of potently neutralizing anti-RV responses. Indeed, previous studies have demonstrated  
65 that socioeconomic status plays a role in generation of anti-RV antibodies (Ray et al.,  
66 2007; Trang et al., 2014). Additionally, maternal vaccination may lead to maternal  
67 antibody interference and decreased immunogenicity in vaccinated infants (Appaiahgari  
68 et al., 2014; Otero et al., 2020). Based on this, other therapeutic strategies for delivery  
69 of potently RV-neutralizing antibodies are needed.

70 In humans and animal models, a high titer of intestinal RV-specific IgA is a correlate of  
71 protection against RV infection and illness (Blutt et al., 2012; Matson et al., 1993; Tô et  
72 al., 1998). Therefore, an ideal way to increase protection against RV infection is to  
73 provide RV-neutralizing IgA to the infant gut via breast milk. Breast milk contains mostly  
74 secretory IgA (sIgA) antibodies; proteolytically stable dimers connected by a joining (J)  
75 chain (Corthesy, 2013; Hurley and Theil, 2011). Passive transfer of sIgA into breast milk  
76 depends on locally-produced dimeric IgA (dIgA) binding to polymeric immunoglobulin  
77 receptor (pIgR) on the basal side of mammary gland epithelial cells via the J-chain  
78 (Goldblum et al., 1975; Johansen et al., 1999; Tuailon et al., 2009). The dIgA-pIgR  
79 complex is then transferred across mammary gland epithelium and secreted into breast  
80 milk as sIgA (De Groot et al., 2000). Once in milk, sIgA provides immune protection by  
81 neutralizing enteric toxins and pathogenic microorganisms and mediating microbiota  
82 colonization through exclusion of exogenous competitors (Mantis et al., 2011; Pabst and  
83 Slack, 2020). In LMIC, high RV-specific antibody titers in breast milk were associated  
84 with decreased incidence of infant RV diarrhea, and partial breastfeeding significantly  
85 increased the risk of infant mortality due to diarrheal disease compared to exclusive  
86 breastfeeding (Arifeen et al., 2001; Jayashree et al., 1988). However, milk RV-  
87 neutralizing antibody titers vary greatly in women from LMIC and may not provide  
88 adequate levels of protection (Trang et al., 2014). Therefore, developing dIgA  
89 therapeutics that are designed for passive transfer into mucosal compartments,  
90 including breast milk, is a novel strategy for enhancing protection of the mother-infant  
91 dyad against infectious enteric pathogens.

92 Here, we developed a murine model of maternal systemic passive antibody  
93 immunization for transfer into breast milk using a murine dlG A monoclonal antibody  
94 (mAb). We demonstrate that following systemic administration of a dlG A mAb in  
95 lactating mice, the mAb is rapidly transported into milk and quickly detected in pup  
96 stomach content in a dose-dependent manner. We then engineered a murine dlG A  
97 version of a human RV-neutralizing IgG (mAb41) (Nair et al., 2017) and optimized it for  
98 enhanced production of dlG A antibodies *in vitro*. We show that dams systemically  
99 injected with the RV-neutralizing dlG A mAb provided protection to their pups against  
100 RV-associated diarrhea. Our results demonstrate that dlG A can passively transfer out of  
101 circulation and into milk to provide a novel strategy for protection against RV disease in  
102 suckling neonates. These studies support the need for clinical assessment of maternal  
103 protective transfer via passive immunization with dlG A, particularly in LMIC where infant  
104 enteric disease burden is high.

105

## 106 **RESULTS**

### 107 **Maternal systemic administration of dlG A results in antibody transfer into milk of** 108 **lactating mice and the gastrointestinal tract of their pups.**

109 To determine whether systemically-administered dlG A passively transfers into milk, we  
110 first used a dlG A mAb generated from a previously-described non-neutralizing RV-  
111 specific murine dlG A 7D9 hybridoma cell line (Burns et al., 1996). We confirmed 7D9  
112 dlG A binding to cognate antigen, the RV capsid protein VP6, and the J-chain receptor  
113 plgR (Figure 1A) demonstrating that 7D9 contains the J-chain needed for plgR-  
114 mediated passive transfer into milk (Figure 1A). The purified 7D9 hybridoma

115 supernatant was also confirmed to contain dimeric antibodies by negative stain electron  
116 microscopy (NSEM) (Figure 1B) and size-exclusion chromatography (SEC) (Figure  
117 S1A). While dimers were the most prevalent antibody species present, we identified  
118 small contributions from higher order IgA species, like tetrameric IgA (Figure S1B).

119 To confirm passive transfer of 7D9 dIgA into milk, lactating BALB/c dams were infused  
120 with 5 mg/kg or 15 mg/kg of 7D9 at 1 to 2 days postpartum and plasma and milk were  
121 collected at 1 hr and 1, 3 and 5 days after infusion to assess antibody concentrations  
122 (Figure 1C). Peak plasma and milk concentrations of 7D9 antibodies, as measured by a  
123 VP6-specific IgA ELISA, were observed 1 hr after infusion in both the 5 mg/kg and 15  
124 mg/kg groups (Figure 1D). To confirm transfer of 7D9 dIgA from milk to suckling pups, a  
125 subset of pups were sacrificed 1-day post infusion from both the 5 mg/kg (n=6) and 15  
126 mg/kg (n=6) litters and their intestinal contents were collected and analyzed for the  
127 presence of 7D9. 7D9 was detected in the stomach content of litters born to dams from  
128 both 5 mg/kg and 15 mg/kg groups in a dose-dependent manner (Figure 1E). 7D9  
129 antibody levels precipitously dropped 1-day post infusion in both the serum and milk of  
130 lactating dams. Low or undetectable levels were observed by day 5 post infusion. This  
131 kinetics suggest rapid transfer of 7D9 dIgA to mucosal secretions, including milk.

132 Indeed, 7D9 IgA was also detected in intestinal and rectal content, at low levels in saliva  
133 but not in vaginal washes (Figure S2A, B), which suggests pIgR expression differences  
134 at different mucosal sites. These data demonstrate systemically-administered dIgA is  
135 efficiently transferred from the systemic circulation to milk and other mucosal  
136 compartments of mouse dams and subsequently into pup stomach content.

137 **Engineering and recombinant production of a RV-neutralizing mouse-human**  
138 **chimeric dIgA**

139 After demonstrating that systemically-administered 7D9 dIgA can passively transfer  
140 from the periphery to milk using our murine lactating mouse model, we aimed to  
141 engineer a RV-neutralizing dIgA that could provide protection against RV-induced  
142 diarrhea. We constructed a dIgA version of a previously-isolated (Nair et al., 2017)  
143 potently-neutralizing RV VP4-specific mAb (mAb#41 or mAb41) by replacing the human  
144 IgG1 with the murine IgA constant region and adding the BALB/c J-chain gene on the  
145 same open reading frame (Figure 2A). Characterization of the recombinantly produced  
146 mAb41 dIgA by ELISA, demonstrated that not all the produced antibody bound to pIgR  
147 (Figure 2B), suggesting that in addition to dIgA, non-dimeric or aggregated IgA species  
148 were also present. Indeed, NSEM (Figure 3A) and SEC (Figure 3B) revealed multiple  
149 IgA species including monomeric and dimeric (Figure 3A) and aggregated (Figure S3)  
150 antibodies. We next fractionated the different IgA species based on size and evaluated  
151 them for their ability to bind (Figure 3C) and neutralize (Figure 3D) RV. Interestingly, the  
152 fraction suspected to be enriched in dIgA (fraction 29-39) had the greatest RV-binding  
153 and neutralization capacity compared to the other isolated fractions.

154 To generate a more homogenous product and skew antibody production towards  
155 increased dimer formation, we designed three additional dIgA constructs, where furin  
156 cleavage sites were added before the 2A self-cleaving peptides to enhance cleavage,  
157 and the J-chain was placed either in the middle (dIgA.2), at the end (dIgA.3) or at the  
158 beginning (dIgA.4) of the ORF (Figure 4A). All constructs produced large amounts of  
159 total mAb41 IgA antibodies (Figure 4B), however placement of the J-chain gene at the



160 end of the construct (dlgA.1) resulted in the highest amount of plgR binding IgA  
161 antibodies (Figure 4C).

162 To address whether modulating the ratio between the J-chain and the heavy and light  
163 chains resulted in increased dimer formation, we generated three additional plasmids  
164 each separately expressing the heavy [H], the light [L] or the J [J] chain genes and  
165 compared dimer production following cells transfection with increasing amounts of J-  
166 chain plasmid. Increasing the amount of J-chain DNA resulted in lower levels of plgR-  
167 binding IgA (Figure 4 D), which is concordant with a previous report of recombinant IgA  
168 production (Lombana et al., 2019). The 4:4:1, 3:3:1 and 4:4:2 ratio of H:L:J chain  
169 plasmids produced the highest level of plgR-binding dimers (Figure 4D).

#### 170 **Recombinant mAb41 dlgA demonstrates greater RV-binding and neutralization** 171 **potency than mAb41 monomeric IgA or IgG1 antibodies**

172 To exclude functional contributions from aggregated dimeric/polymeric or monomeric  
173 IgA (mIgA) antibodies, recombinantly produced mAb41 dlgA was fractionated by SEC  
174 (Figure 5A) and the average molecular weight of 300 kDa was selected as fractionated  
175 mAb41 dlgA (f-dlgA mAb41), which is consistent with the expected mass of dlgA at  
176 approximately 335 kDa. NSEM demonstrated that the f-dlgA mAb41 product contained  
177 only dimeric antibodies (Figure 5B). The f-mAb41 dlgA product was then tested for  
178 functional capacity in comparison with mIgA mAb41 and IgG mAb41. f-dlgA mAb41  
179 demonstrated greater RV-binding capacity and neutralization activity (AUC=31.9; IC<sub>90</sub> =  
180 7.1 ng/ml) compared to mIgA (AUC=24.8; IC<sub>90</sub> = 44.8 ng/ml ) or IgG (AUC=19.7; IC<sub>90</sub> =  
181 33.01 ng/ml) (Figures 5C and 5D). This difference in neutralization activity was even  
182 greater when IC<sub>90</sub> values were normalized for antibody molecular weight, resulting in a

183 42-fold reduction in IC<sub>90</sub> value for f-dIgA mAb41 (21.2 pM) compared to mIgA (298.3  
184 pM) and IgG (220.5 pM).

### 185 **Pharmacokinetics (PK) of intravenous 7D9 dIgA infusion in the blood and milk** 186 **compartments of lactating BALB/c dams**

187 To determine the optimal dose of dIgA for systemic maternal infusion, we used an  
188 Empirical Bayesian estimate of individual PK parameters in both plasma and milk from  
189 7D9 infused dams. Antibody level data were used in simulation for multiple doses  
190 including 5 mg/kg (Figure S4A), 10 mg/kg (Figure S4B), and 15 mg/kg (Figure S4C). To  
191 estimate the antibody concentrations in serum and milk, 7D9 concentrations were  
192 simulated at 24 to 192 hrs in 24-hr intervals. Dosing intervals of 1 to 3 days were  
193 explored. Using a 1-day dosing interval, concentrations of 7D9 remained stable up to 8  
194 days after the first dose (Figure S4A). However, with the 2- (Figure S4B) and 3-day  
195 (Figure S4C) dosing intervals, 7D9 concentrations dropped by day 2 post-infusion and  
196 continued to decrease without an additional dose. The intercompartmental clearance  
197 from plasma to milk was 0.11 mL/h and the elimination half-life was 13.55 (6.13 – 18.90)  
198 hrs. The observed elimination half-life of 7D9 dIgA is similar to that of dIgA reported in  
199 other species (<1 day to ~4 days), including mice and rhesus macaques (Challacombe  
200 and Russell, 1979; Lombana et al., 2019)

### 201 **Maternal passive immunization with systemic mAb41 dIgA protects against RV-** 202 **induced diarrhea in suckling pups**

203 To determine if passive transfer of mAb41 dIgA in milk results in protection from RV  
204 induced diarrhea in suckling neonates, we developed a RV challenge model using  
205 lactating 129sv mice dams and their pups. We chose 129sv mice strain as 129sv pups

206 develop detectable diarrhea after oral inoculation with human RV (Nair et al., 2017). We  
207 first confirmed that similarly to BALB/c mice, both fractionated and unfractionated  
208 mAb41 dIgA passively transferred into the milk of 129sv mice after IV infusion (Figure  
209 S5). In addition to blood and milk, mAb41 dIgA was also detected in vaginal washes  
210 and feces, but not in intestinal content (Figure S5). This was different from what we  
211 observed in BALB/c mice (Figure S2), suggesting strain-specific differences in pIgR  
212 expression resulting in different rates of passive transfer of the two dimeric IgA  
213 antibodies. Next, lactating 129sv dams were injected in the tail vein with 5 mg/kg of f-  
214 dIgA mAb41 at 4 to 6 days postpartum (Figure 6A). Due to the short half-life of dIgA in  
215 milk, as determined by our PK analysis (Figure S4) and to maximize the amount of f-  
216 dIgA mAb41 in the gastrointestinal tract of suckling pups at the time of RV inoculation,  
217 pups were inoculated with  $1 \times 10^6$  FFU of RV Wa strain between 1 to 2 hrs post dam  
218 injection. Litters born to dams injected with 5 mg/kg mAb41 dIgA had lower incidence of  
219 diarrhea (7.1%) upon gentle abdomen palpation (Figure 6B,D) compared to litters born  
220 to saline-immunized dams (88%) (Figure 6C,D). Significantly lower RV antigen per gram  
221 of intestine was observed in pups born to mAb41 dIgA-immunized mothers compared to  
222 pups of saline-injected mothers (Figure 6E). Additionally, mAb41 dIgA was detected in  
223 the stomach contents of the suckling pups (Figure 6F), which exhibited RV  
224 neutralization capacity at the highest dilution measured (Figure 6G) without  
225 compromising viability of the cell monolayer (Figure S6). Thus, mAb41 dIgA passively  
226 transferred to suckling pups through the milk of lactating dams to protect against RV-  
227 induced diarrhea.

228

## 229 DISCUSSION

230 Breast milk contains high levels of sIgA that act as the first line of defense against  
231 enteric infection in suckling infants (Glass and Stoll, 1989; Ruiz-Palacios et al., 1990;  
232 Torres and Cruz, 1993). Despite this, the burden of RV disease in LMIC remains high,  
233 likely due to a combination of factors including high pathogen load, malnutrition and  
234 decreased vaccine efficacy compared to high income countries (Guerrant et al., 2008;  
235 Otero et al., 2020; Velasquez et al., 2018). Neutralizing antibodies against the external  
236 RV proteins VP4 and VP7 play a role in protective immunity against RV infection  
237 (Clarke and Desselberger, 2015; Desselberger and Huppertz, 2011; Greenberg et al.,  
238 1983; Offit and Blavat, 1986). Therefore, enhancing RV-neutralizing sIgA in breast milk  
239 is an ideal strategy to provide protection against RV disease in the suckling infant.  
240 However, to date, there are no mAb therapies approved or tested for the treatment or  
241 prevention of neonatal infection via passive transfer into breast milk in either humans or  
242 animal models. In this study, we sought to develop therapeutic strategies that deliver  
243 maternal sIgA into breast milk and could enhance protection against RV disease in the  
244 suckling neonate.

245 We first developed a mouse lactation model and demonstrated that a systemically  
246 administered a RV non-neutralizing 7D9 dIgA purified from a previously described  
247 hybridoma (Greenberg 1996) passively transfers into dams' breast milk and the  
248 gastrointestinal tract of suckling pups. We then investigated the half-life of a RV  
249 neutralizing mAb41 dIgA. After systemic infusion, the elimination half-life was short  
250 [13.55 (6.13 – 18.90) hrs] compared to what is reported for circulating IgG (15-30 days  
251 depending on the subclass) (Mankarious et al., 1988) and was consistent with previous

252 reports (Lombana et al., 2019). Varying amounts of mAb41 dIgA were also detected in  
253 the intestinal content, vaginal washes, and saliva. These data suggest that in addition to  
254 breast milk, systemically-administered dIgA can traffic to other pIgR-expressing  
255 mucosal sites. Dimeric IgA mAb therapeutic strategies that target a particular site, like  
256 the mammary gland, will need to consider the biodistribution into other mucosal tissues.  
257 Future work should focus on improving dIgA half-life using viral vectors or nucleic acid  
258 delivery systems, and on developing strategies to target specific mucosal tissues.

259 Exploration of the therapeutic potential of neutralizing dIgA *in vivo* has been hampered  
260 by the difficulties in production and purification of dIgA at desired antibody quantities  
261 (Reinhart and Kunert, 2015; Viridi et al., 2016). We therefore generated several plasmid  
262 constructs to optimize the production of a potent RV-neutralizing dIgA (mAb41). We  
263 observed that the construct in which the J-chain gene was placed after the heavy and  
264 light chain genes produced the highest level of dIgA following recombinant production.  
265 This suggests that spatiotemporal production of the IgA heavy, light and J-chain in the  
266 cell influences dimerization and therefore, dIgA production. While there are few studies  
267 investigating the molecular mechanisms of J-chain protein production and IgA  
268 multimerization *in vitro* or *in vivo*, a recent study demonstrated that the B cell chaperone  
269 protein MZB1 plays a role (Xiong et al., 2019). Recombinant production of dIgAs in cells  
270 expressing MZB1 may improve dimer formation. We also observed that decreasing the  
271 amount of J-chain DNA relative to heavy and light chain DNA, resulted in higher levels  
272 of dIgA. These results are not surprising, given that each dimer comprises two IgA  
273 monomers linked together by a single J-chain and are likely due to an imbalance in the  
274 ratio of available heavy and light chains that can dimerize with J-chain. Functional

275 characterization of the newly generated mAb41 dIgA demonstrated that the dimer had  
276 higher neutralization potency compared to both IgA and IgG monomers which may be  
277 due to the higher number of available binding sites present on dimers compared to  
278 monomers. Isotype-specific mAb protection has been previously demonstrated in both  
279 *in vitro* and *in vivo* studies. Mice were better protected from influenza infection in the  
280 nasopharynx after systemic administration of anti-influenza polymeric IgA antibodies  
281 compared to IgG (Renegar and Small, 1991a, b; Renegar et al., 2004). Interestingly,  
282 however recombinantly produced poliovirus-specific antibodies had similar  
283 neutralization activity whether they were produced as mIgA, dIgA or IgG (Puligedda et  
284 al., 2020) which suggests that isotype-specific differences in functional capacity may be  
285 pathogen and even epitope specific.

286 Finally, using the 129sv mouse model of human RV challenge we showed that a  
287 systemically-administered RV-neutralizing dIgA antibody can passively transferred into  
288 breast milk and protected suckling neonates from RV-induced diarrhea. Our data  
289 support the development of passive immunization strategies with neutralizing dIgA in  
290 lactating women to reduce mother-to-child transmission of breast milk-transferred  
291 enteric infections including RV, norovirus, and poliovirus, and non-enteric infections like  
292 HIV. While passive antibody transfer studies via breast milk have yet to be performed in  
293 human infants, oral delivery of recombinant mAbs has been explored. Interestingly,  
294 while orally fed palivizumab (anti-RSV IgG1 mAb) was not stable across the infant  
295 gastrointestinal tract (Lueangsakulthai et al., 2020a), natural anti-RSV IgG and IgA from  
296 breast milk were stable through all phases of simulated infant digestion  
297 (Lueangsakulthai et al., 2020b). This demonstrates that delivering pathogen-specific

298 sIgA via breast milk may be a more attractive strategy than oral feeding. The differences  
299 in stability between breast milk-derived and recombinant anti-RSV antibodies may be  
300 due glycosylation differences. Indeed, recombinant antibodies are differentially  
301 glycosylated compared to endogenous antibodies and IgA is more heavily glycosylated  
302 than IgG, resulting in altered function (Higel et al., 2016; Langel et al., 2020).

303 The protective transfer strategy is attractive for clinical translation for several reasons:  
304 (1) dIgA antibodies directly traffic to mucosal sites, including the mammary gland and  
305 passively transfer into breast milk and then to the infant digestive tract as sIgA; (2)  
306 dIgA/sIgA may have increased capacity for virus neutralization compared to IgG; (3)  
307 breast milk sIgA is more resistant to proteolysis in the stomach and/or gut compared to  
308 other isotypes oral delivery of recombinant sIgA in infants; 4) the short-half-life of dIgA  
309 may circumvent maternal anti-drug reactions; and (5) dIgA in circulation will traffic to  
310 other maternal mucosal sites including the gut, providing dual protection of the  
311 maternal-neonatal dyad against enteric infection. Future work could focus on increasing  
312 the half-life of dIgA and developing strategies to target specific mucosal tissues.

313 Development of novel strategies that reduce infant mortality against enteric infections is  
314 imperative to reach the World Health Organization's goal to end preventable deaths of  
315 newborns by 2030. Our results will help guide the development of novel maternal  
316 immunization strategies, which may leverage passive transfer of neutralizing dIgA into  
317 breastmilk and decrease infant morbidity and mortality against enteric pathogens.

318

## 319 **METHODS**

320 *Cells and viruses*

321 African Green Monkey kidney epithelial cell line MA104 (CRL-2378.1) was obtained  
322 from American Type Culture Collection (ATCC) and cultured in MEM-alpha (Life  
323 Technologies) supplemented with 10% fetal bovine serum (FBS), 50 µ/ml of penicillin  
324 and 50 µg/ml of streptomycin (Invitrogen). Rotavirus strain A (Wa) (ATCC) was  
325 propagated in MA104 cells as previously described (Patton et al., 2009).

326 *Rotavirus quantification*

327 RV was quantified using a fluorescence focus forming assay (Patton et al., 2009). In  
328 brief, RV was activated with 10 µg/ml of trypsin for 1 hr in a 37°C water bath. Serially  
329 diluted virus was added to confluent MA104 cells and incubated for 1 hr at 37°C.  
330 Inoculum was removed and growth medium including DMEM (Life Technologies), 5%  
331 FBS, 50 µ/ml of penicillin and 50 µg/ml of streptomycin (Invitrogen) was added. Infected  
332 cells were then incubated at 37°C for 12 to 18 hrs. Medium was removed from the  
333 plates and fixed with 10% formalin in neutral buffered saline for 20 minutes. Wells were  
334 then washed with 2% FBS and cells were permeated with 0.5% Triton-X in PBS for an  
335 additional 15 minutes. Wells were washed twice and 7D9 (VP6-specific, murine IgA  
336 antibody) was added at 10 µg/ml in 2% FBS as the primary detection antibody for 1 hr  
337 at room temperature (RT). Cells were washed twice and an anti-murine IgA antibody  
338 conjugated to FITC (1:100; Southern Biotec) was added to wells for 1 hr at RT. Cells  
339 were washed four times with wash solution and DRAQ5 nuclear stain (Fisher Scientific)  
340 was added to cells at 1:2000 dilution. Cells were washed once with PBS and  
341 resuspended in 10 µl of PBS. Infection was quantified in each well by automated cell  
342 counting software using a Cellomics Arrayscan VTI HCS instrument at ×10



343 magnification. Subsequently, the percent of infected cells was determined as  
344 FITC<sup>+</sup>DRAQ5<sup>+</sup> cells.

#### 345 *7D9 Antibody production*

346 The 7D9 hybridoma line was cultured in ClonaCell™-HY Medium E (STEMCELL  
347 Technologies) prior to antibody production. To produce large quantities of 7D9, cells  
348 were resuspended in Hybridoma Serum Free Medium (Fisher Scientific) and seeded in  
349 the cell compartment of a bioreactor, with Medium E providing nutrients from the  
350 medium compartment. Antibody was harvested from the cell supernatant after 5 to 7  
351 days post inoculation and purified using Protein L Sepharose beads (Thermo Fisher  
352 Scientific).

#### 353 *Construction of mAb41 plasmids and antibody production*

354 To generate the human-mouse chimeric mAb41 IgA and IgG, we took the variable  
355 domain sequences of a previously isolated human anti-RV VP4 specific neutralizing  
356 mAb (*i.e.*, mAb#41) (Nair et al., 2017), attached it to the murine IgA and IgG constant  
357 regions (accession numbers: AB644393.1, JQ048937.1, KT336476.1, JQ048937.1),  
358 respectively, and cloned it into the pcDNA3.1 expression vector. A third plasmid  
359 encoding the BALB/c J-chain sequence (accession number: AB664392.1) was also  
360 generated. The heavy, light and J chain of mAb41 IgA were also cloned into a single  
361 open reading frame, and in different orientations as shown in Figure 4. The 2A self-  
362 cleaving peptide technology was used to express both the heavy, light and J chain  
363 genes from a single open reading frame. Antibodies were produced by transient  
364 transfection of human epithelium kidney 293T Lenti-X cells (Clontech Laboratories,

365 Mountain View, CA) using the JetPrime transfection kit (Polyplus Transfection Illkirch,  
366 France) following the manufacture's recommendations. Different amounts of each  
367 plasmid were transfected as shown in Figure 4. Antibodies were harvested from cell  
368 supernatants at 4 to 5 days post transfection and purified using CaptureSelect™ LC-  
369 lambda (mouse) Affinity Matrix (Thermo Fisher Scientific).

#### 370 *Dimeric IgA characterization and purification*

371 Dimeric antibodies (7D9 and mAb41) were characterized and fractionated by size  
372 exclusion chromatography using a Superose 6 10/300 GL on an AKTA liquid  
373 chromatography system and concentrated on AmiconUltra 100k spin columns  
374 (Millipore).

#### 375 *Negative-stain electron microscopy (NSEM)*

376 Antibodies were diluted to 100 mg/ml final concentration with buffer containing 10 mM  
377 NaCl, 20 mM HEPES buffer, pH 7.4, 5% glycerol and 7.5 mM glutaraldehyde. After 5-  
378 minute incubation, excess glutaraldehyde was quenched by adding sufficient 1 M Tris  
379 stock for a final Tris 75 mM for 5 mins; then samples were stained with 2% uranyl  
380 formate. Images were obtained with a Philips 420 electron microscope operated at 120  
381 kV, at 82,000 × magnification and a 4.02 Å pixel size. RELION 3.0 (Zivanov et al.,  
382 2018) was used for CTF correction, automatic particle picking and 2D class averaging  
383 of the single-particle images.

#### 384 *Animals*

385 Timed pregnant BALB/c and 129sv mice were obtained from Charles River laboratories  
386 and Taconic Biosciences, respectively. Upon arrival, all mice were maintained in a

387 pathogen-free animal facility under a standard 12 hr light/12 h dark cycle at RT with  
388 access to food and water *ad libitum*. Timed pregnant mice received a supplemental  
389 nutritional gel to decrease risk of pup savaging. For IV injections of recombinant dIgA  
390 mAbs, animals were restrained using a mouse tail vein restrainer. For mouse milking,  
391 dams were separated from their pups for at least 2 hrs to allow milk accumulation while  
392 pups were kept warm on a heating pad. Dams were administered 2 IU/kg of oxytocin via  
393 intraperitoneal (IP) injection. The mammary area was wiped with sterile alcohol prep  
394 pad before manually expressing the teat with thumb and forefinger to gently massage  
395 the mammary tissue in an upward motion until a visible bead of milk formed at the base  
396 of the teat. A sterile pipet tip was used to gently pull the milk into the tip. All teats were  
397 milked two times. Milk was diluted 1:4 with PBS and filtered with 0.22  $\mu$ m Spin-x  
398 centrifugal filters (Costar) at 4°C at 15,000 x g for 30 min. The Spin-x filter separated the  
399 lipid portion of the milk from the liquid whey portion, and the liquid whey portion was  
400 stored in -20°C. Blood samples were collected from the facial vein (submandibular). The  
401 blood was allowed to clot at ambient temperature. Clotted blood samples were  
402 maintained at RT and centrifuged for 6,000 RPM for 15 min. The serum was separated  
403 from the blood and stored at -20°C.

404 For RV infection, neonatal 129sv mice (5 days old) were orally gavaged with a minimum  
405 of  $1 \times 10^6$  FFU of RV Wa. Pup stomach contents and intestines were collected and  
406 homogenized in 500  $\mu$ m PBS using a TissueLyzer II (Qiagen) for 5 min at 50 Hz with a  
407 stainless steel ball added as a pulverizer. Pulverized stomach content and intestinal  
408 tissue were transferred to a new microcentrifuge tube and spun for 10 minutes at 3,000  
409 RPM. Supernatants were collected and then filtered via 0.22- $\mu$ m Spin-x centrifugal filter

410 tubes by centrifugation at 18,000 × *g* for 20 mins at 4°C. A protease cocktail (1X)  
411 (Fisher Scientific) was added (and samples were stored at -20°C until further analysis.

#### 412 *Biodistribution studies*

413 After IV injection of recombinant mAbs, mice were euthanized via CO<sub>2</sub> asphyxiation.  
414 Mice oral and vaginal cavities were immediately washed with 100 µL of PBS. Oral and  
415 vaginal washes were centrifuged at 3,000 RPM for 10 mins to pellet any cellular debris.  
416 The supernatant was then collected and stored at -20°C. Additionally, intestinal and  
417 rectal contents were collected and diluted in 500 µl of PBS. The diluted samples were  
418 then filtered via 0.22-µm Spin-x centrifugal filter tubes by centrifugation at 15,000 × *g* for  
419 30 mins. Protease inhibitors were added (1X) and samples were stored at -20°C until  
420 further analysis.

#### 421 *VP6 binding IgA antibody ELISA*

422 Recombinant VP6 protein (head domain; residues 147-339 of full-length VP6) was  
423 expressed in *E. coli* and purified through affinity chromatography using a Ni-NTA  
424 column and size-exclusion chromatography using a Superdex 200 10/300 GL column  
425 as previously described (Aiyegbo et al., 2013). Nunc® Maxisorp™ 384-well plates were  
426 coated with 3 µg/ml of recombinant VP6 protein diluted in coating solution concentrate  
427 (Seracare) overnight at 4°C. Plates were washed one time (PBS, 0.5% Tween-20) and  
428 incubated for 2 hrs with blocking solution (PBS, 4% whey protein, 15% goat serum,  
429 0.5% Tween-20). Antibodies were diluted in blocking solution and added to wells in  
430 duplicate for 1 hr. Plates were then washed twice and incubated for 1 hr with an HRP-  
431 conjugated, goat anti-mouse IgA antibody (Southern Biotech) at a 1:5000 dilution. After

432 4 washes, SureBlue Reserve TMB Microwell Peroxidase Substrate (KPL) was added to  
433 the wells for 10 mins, and the reaction was stopped by addition of 1% HCl solution.  
434 Plates were read at 450 nm. OD values within the linear range of a standard curve were  
435 used to interpolate the concentration of VP6-binding IgA antibodies in the transfection  
436 products. The standard curve was generated by serial dilutions of 7D9 dIgA.

#### 437 *pIgR binding IgA antibody ELISA*

438 J-chain containing IgA antibodies were measured by pIgR binding ELISA. Nunc®  
439 Maxisorp™ 384-well plates were coated with 6 µg/ml of recombinant mouse pIgR  
440 protein (R&D Systems) diluted in coating solution concentrate (Seracare) overnight at  
441 4°C. The ELISA assay was completed as described above. OD values within the linear  
442 range of a standard curve were used to interpolate the concentration of pIgR-binding  
443 IgA antibodies in the transfection products. The standard curve was generated by serial  
444 dilutions of 7D9 dIgA.

#### 445 *mAb41 anti-idiotypic antibody ELISA*

446 Nunc® Maxisorp™ 384-well plates were coated with 1 µg/ml of an mAb41 anti-idiotypic  
447 antibody (Biogenes GmbH) diluted in coating solution (Seracare) overnight at 4°C. The  
448 ELISA assay was completed as previously described above. OD values within the linear  
449 range of a standard curve were used to interpolate the concentration of pIgR-binding  
450 IgA antibodies in the transfection products. The standard curve was generated by serial  
451 dilutions of mAb41 mIgA antibodies.

#### 452 *Rotavirus infected cell binding assay*

453 MA104 cells were seeded into 96-well plates and incubated until confluent (3-4 days) at  
454 37°C and 5% CO<sub>2</sub>. RV Wa was thawed at RT and activated with 10 µg/ml of trypsin for  
455 30 mins at 37°C. RV was added to cells at MOI 2 and incubated at 37°C and 5% CO<sub>2</sub>  
456 for 20 to 22 hrs. Cells were fixed with 10% neutral buffered formalin for 20 mins. Cells  
457 were washed once with wash solution (2% FBS in PBS). To permeate cell membranes,  
458 0.5% Triton-X in PBS was added to cells for 15 mins. Cells were washed twice and 7D9  
459 added to all wells at 10 µg/ml and incubated for 1 hr in the dark at RT. Cells were  
460 washed twice with wash solution and an anti-mouse IgA FITC secondary (Abcam) was  
461 added at 1:100 dilution and incubated for 1 hr in the dark at RT. Cells were washed four  
462 times with wash solution and DRAQ5 nuclear stain (Fisher Scientific) was added to cells  
463 at 1:2000 dilution. Cells were washed once with PBS and resuspended in 10 µl of PBS.  
464 Infection was quantified in each well by automated cell counting software using a  
465 Cellomics Arrayscan VTI HCS instrument at ×10 magnification. Subsequently, the  
466 percent infected cells were determined as FITC<sup>+</sup>DRAQ5<sup>+</sup> cells.

467 *Rotavirus neutralization assay.* MA104 cells were seeded into 96-well plates and  
468 incubated until confluent (3-4 days) at 37°C and 5% CO<sub>2</sub>. RV Wa was thawed at RT and  
469 activated with 10 µg/ml of trypsin for 30 mins at 37°C. Serial dilutions of mAbs or  
470 homogenized stomach contents were incubated with RV Wa (MOI = 4) in 50 µl for 1.5  
471 hrs at 37°C. The virus/mAb or virus/plasma dilutions were then added in duplicate to  
472 wells containing MA104 cells and incubated at 37°C for 20 to 22 hrs. Cells were fixed  
473 with 10% neutral buffered formalin for 20 mins. Cells were washed once with wash  
474 solution (2% FBS in PBS). To permeate cell membranes, 0.5% Triton-X in PBS was  
475 added to cells for 15 minutes. Cells were washed twice and 7D9 added to all wells at 10

476  $\mu\text{g/ml}$  and incubated for one hr in the dark at RT. Cells were washed twice with wash  
477 solution and anti-mouse IgA FITC secondary (Abcam) was added at 1:100 dilution and  
478 incubated for 1 hr in the dark at RT. Cells were washed four times with wash solution  
479 and DRAQ5 nuclear stain (Fisher Scientific) was added to cells at 1:2000 dilution. Cells  
480 were washed once with PBS and resuspended in 10  $\mu\text{l}$  of PBS. Infection was quantified  
481 in each well by automated cell counting software using a Cellomics Arrayscan VTI HCS  
482 instrument at  $\times 10$  magnification. Subsequently, the  $\text{ID}_{50}$  was calculated as the sample  
483 dilution that caused a 50% reduction in the number of infected cells compared with wells  
484 treated with virus only using the Reed and Muench method.

485 *Rotavirus antigen ELISA*. An EDI fecal rotavirus antigen ELISA kit was used according  
486 to the manufacturer's protocol. In brief, 100  $\mu\text{l}$  aliquot of the homogenized intestinal  
487 samples were diluted in kit diluent and added in equal volumes to duplicate wells. A set  
488 of standards was included (0, 1.9, 5.6, 16.7, 50, 150 and 300 ng/ml). Samples were  
489 incubated for 1 hr at RT. Wells were washed 5 times with washing buffer and incubated  
490 with 100  $\mu\text{l}$  of tracer antibody for 30 mins at RT. The wells were washed and 100  $\mu\text{l}$  of  
491 the antibody substrate was added. Samples were incubated in the dark for up to 15  
492 mins and 100  $\mu\text{l}$  of stop solution was added to stop the reaction. The absorbance  
493 readings were generated at 450 nm. A standard curve was plotted and the antigen  
494 concentration in the samples was calculated from the curve.

## 495 **Acknowledgements**

496 We thank Bridget Pickle and the Duke's Division of Laboratory Animal Resources staff  
497 for expert assistance. We thank Kathy Yarborough, Jaimie Carter, and Dr. Jamie  
498 Peacock at the Duke Protein Production Facility in the Duke Human Vaccine Institute

499 for their assistance in size exclusion chromatography. We thank Dr. So Young Kim in  
500 the Functional Genomics Facility for her expertise in the Cellomics Arrayscan VTI HCS  
501 instrument. The graphical abstract was created using the BioRender  
502 ([www.biorender.com](http://www.biorender.com)). This work was supported by the Bill and Melinda Gates  
503 Foundation award OPP1189362 (S.P. and M.B.) and funding from the Translating Duke  
504 Health Initiative (P.A.).

### 505 **Author contributions**

506 S.N.L. contributed to study design, analyzed the data and wrote the manuscript. S.N.L.,  
507 J.T., J.C., T.T., H.W., C.E.O., L.W., J.C., H.G. performed experiments, including  
508 antibodies production, ELISA, neutralization assays and in vivo studies. W.H. and H.C.  
509 performed the pharmacokinetics analysis. R.E. and K.M. performed the negative stain  
510 electron microscopy. V.S. and P.A. performed size exclusion chromatography and  
511 molecular weight determination. M.B. and S.R.P. conceived the study, oversaw the  
512 planning and direction of the project including analysis and interpretation of the data and  
513 editing of the manuscript. All authors read, revised, and approved the final manuscript.

### 514 **Conflict of interest**

515 J.E.C. has served as a consultant for Luna Biologics, is a member of the Scientific  
516 Advisory Board of Meissa Vaccines and is Founder of IDBiologics. The Crowe  
517 laboratory at Vanderbilt University Medical Center has received unrelated sponsored  
518 research agreements from Takeda Vaccines, IDBiologics and AstraZeneca. S.R.P.  
519 provides individual consulting services to Moderna, Merck, Dynavax, and Pfizer. Merck



520 Vaccines and Moderna have provided grants and contracts for S.R.P. sponsored  
521 programs.

## 522 REFERENCES

- 523 Aiyegbo, M.S., Sapparapu, G., Spiller, B.W., Eli, I.M., Williams, D.R., Kim, R., Lee, D.E.,  
524 Liu, T., Li, S., Woods, V.L., Jr., *et al.* (2013). Human rotavirus VP6-specific antibodies  
525 mediate intracellular neutralization by binding to a quaternary structure in the  
526 transcriptional pore. *PLoS One* 8, e61101.
- 527 Appaiahgari, M.B., Glass, R., Singh, S., Taneja, S., Rongsen-Chandola, T., Bhandari,  
528 N., Mishra, S., and Vрати, S. (2014). Transplacental rotavirus IgG interferes with immune  
529 response to live oral rotavirus vaccine ORV-116E in Indian infants. *Vaccine* 32, 651-  
530 656.
- 531 Arifeen, S., Black, R.E., Antelman, G., Baqui, A., Caulfield, L., and Becker, S. (2001).  
532 Exclusive breastfeeding reduces acute respiratory infection and diarrhea deaths among  
533 infants in Dhaka slums. *Pediatrics* 108, E67.
- 534 Blutt, S.E., Miller, A.D., Salmon, S.L., Metzger, D.W., and Conner, M.E. (2012). IgA is  
535 important for clearance and critical for protection from rotavirus infection. *Mucosal*  
536 *Immunology* 5, 712-719.
- 537 Burke, R.M., Tate, J.E., Kirkwood, C.D., Steele, A.D., and Parashar, U.D. (2019).  
538 Current and new rotavirus vaccines. *Current opinion in infectious diseases* 32, 435-444.
- 539 Burnett, E., Jonesteller, C.L., Tate, J.E., Yen, C., and Parashar, U.D. (2017). Global  
540 Impact of Rotavirus Vaccination on Childhood Hospitalizations and Mortality From  
541 Diarrhea. *The Journal of infectious diseases* 215, 1666-1672.
- 542 Burns, J.W., Siadat-Pajouh, M., Krishnaney, A.A., and Greenberg, H.B. (1996).  
543 Protective effect of rotavirus VP6-specific IgA monoclonal antibodies that lack  
544 neutralizing activity. *Science* 272, 104-107.
- 545 Challacombe, S.J., and Russell, M.W. (1979). Estimation of the intravascular half-lives  
546 of normal rhesus monkey IgG, IgA and IgM. *Immunology* 36, 331-338.
- 547 Clarke, E., and Desselberger, U. (2015). Correlates of protection against human  
548 rotavirus disease and the factors influencing protection in low-income settings. *Mucosal*  
549 *Immunology* 8, 1-17.
- 550 Corthesy, B. (2013). Multi-Faceted Functions of Secretory IgA at Mucosal Surfaces.  
551 *Frontiers in Immunology* 4.
- 552 De Groot, N., Van Kuik-Romeijn, P., Lee, S.H., and De Boer, H.A. (2000). Increased  
553 immunoglobulin A levels in milk by over-expressing the murine polymeric  
554 immunoglobulin receptor gene in the mammary gland epithelial cells of transgenic mice.  
555 *Immunology* 101, 218-224.
- 556 Desselberger, U., and Huppertz, H.I. (2011). Immune responses to rotavirus infection  
557 and vaccination and associated correlates of protection. *J Infect Dis* 203, 188-195.
- 558 Desyibelew, H.D., and Dadi, A.F. (2019). Burden and determinants of malnutrition  
559 among pregnant women in Africa: A systematic review and meta-analysis. *PLoS One*  
560 14, e0221712-e0221712.
- 561 Glass, R.I., and Stoll, B.J. (1989). The protective effect of human milk against diarrhea.  
562 A review of studies from Bangladesh. *Acta Paediatr Scand Suppl* 351, 131-136.
- 563 Goldblum, R.M., Ahlstedt, S., Carlsson, B., Hanson, L.A., Jodal, U., Lidin-Janson, G.,  
564 and Sohl-Akerlund, A. (1975). Antibody-forming cells in human colostrum after oral  
565 immunisation. *Nature* 257, 797-798.

566 Greenberg, H.B., Valdesuso, J., van Wyke, K., Midthun, K., Walsh, M., McAuliffe, V.,  
567 Wyatt, R.G., Kalica, A.R., Flores, J., and Hoshino, Y. (1983). Production and preliminary  
568 characterization of monoclonal antibodies directed at two surface proteins of rhesus  
569 rotavirus. *J Virol* *47*, 267-275.

570 Guerrant, R.L., Oriá, R.B., Moore, S.R., Oriá, M.O., and Lima, A.A. (2008). Malnutrition  
571 as an enteric infectious disease with long-term effects on child development. *Nutr Rev*  
572 *66*, 487-505.

573 Harika, R., Faber, M., Samuel, F., Kimiywe, J., Mulugeta, A., and Eilander, A. (2017).  
574 Micronutrient Status and Dietary Intake of Iron, Vitamin A, Iodine, Folate and Zinc in  
575 Women of Reproductive Age and Pregnant Women in Ethiopia, Kenya, Nigeria and  
576 South Africa: A Systematic Review of Data from 2005 to 2015. *Nutrients* *9*.

577 Higel, F., Seidl, A., Sörgel, F., and Friess, W. (2016). N-glycosylation heterogeneity and  
578 the influence on structure, function and pharmacokinetics of monoclonal antibodies and  
579 Fc fusion proteins. *European journal of pharmaceutics and biopharmaceutics : official  
580 journal of Arbeitsgemeinschaft fur Pharmazeutische Verfahrenstechnik eV* *100*, 94-100.

581 Hurley, W.L., and Theil, P.K. (2011). Perspectives on immunoglobulins in colostrum and  
582 milk. *Nutrients* *3*, 442-474.

583 Jayashree, S., Bhan, M.K., Kumar, R., Bhandari, N., and Sazawal, S. (1988). Protection  
584 against neonatal rotavirus infection by breast milk antibodies and trypsin inhibitors. *J  
585 Med Virol* *26*, 333-338.

586 Johansen, F.E., Pekna, M., Norderhaug, I.N., Haneberg, B., Hietala, M.A., Krajci, P.,  
587 Betsholtz, C., and Brandtzaeg, P. (1999). Absence of epithelial immunoglobulin A  
588 transport, with increased mucosal leakiness, in polymeric immunoglobulin  
589 receptor/secretory component-deficient mice. *J Exp Med* *190*, 915-922.

590 Jonesteller, C.L., Burnett, E., Yen, C., Tate, J.E., and Parashar, U.D. (2017).  
591 Effectiveness of Rotavirus Vaccination: A Systematic Review of the First Decade of  
592 Global Postlicensure Data, 2006-2016. *Clinical infectious diseases : an official  
593 publication of the Infectious Diseases Society of America* *65*, 840-850.

594 Langel, S.N., Otero, C.E., Martinez, D.R., and Permar, S.R. (2020). Maternal  
595 gatekeepers: How maternal antibody Fc characteristics influence passive transfer and  
596 infant protection. *PLoS pathogens* *16*, e1008303-e1008303.

597 Lombana, T.N., Rajan, S., Zorn, J.A., Mandikian, D., Chen, E.C., Estevez, A., Yip, V.,  
598 Bravo, D.D., Phung, W., Farahi, F., *et al.* (2019). Production, characterization, and in  
599 vivo half-life extension of polymeric IgA molecules in mice. *MAbs* *11*, 1122-1138.

600 Mankarious, S., Lee, M., Fischer, S., Pyun, K.H., Ochs, H.D., Oxelius, V.A., and  
601 Wedgwood, R.J. (1988). The half-lives of IgG subclasses and specific antibodies in  
602 patients with primary immunodeficiency who are receiving intravenously administered  
603 immunoglobulin. *J Lab Clin Med* *112*, 634-640.

604 Mantis, N.J., Rol, N., and Corthésy, B. (2011). Secretory IgA's complex roles in  
605 immunity and mucosal homeostasis in the gut. *Mucosal Immunology* *4*, 603-611.

606 Matson, D.O., O'Ryan, M.L., Herrera, I., Pickering, L.K., and Estes, M.K. (1993). Fecal  
607 antibody responses to symptomatic and asymptomatic rotavirus infections. *J Infect Dis*  
608 *167*, 577-583.

609 Mwila, K., Chilengi, R., Simuyandi, M., Permar, S.R., and Becker-Dreps, S. (2017).  
610 Contribution of Maternal Immunity to Decreased Rotavirus Vaccine Performance in

611 Low- and Middle-Income Countries. *Clinical and vaccine immunology* : CVI 24, e00405-  
612 00416.

613 Nair, N., Feng, N., Blum, L.K., Sanyal, M., Ding, S., Jiang, B., Sen, A., Morton, J.M., He,  
614 X.-S., Robinson, W.H., *et al.* (2017). VP4- and VP7-specific antibodies mediate  
615 heterotypic immunity to rotavirus in humans. *Science Translational Medicine* 9,  
616 eaam5434.

617 Offit, P.A., and Blavat, G. (1986). Identification of the two rotavirus genes determining  
618 neutralization specificities. *J Virol* 57, 376-378.

619 Otero, C.E., Langel, S.N., Blasi, M., and Permar, S.R. (2020). Maternal antibody  
620 interference contributes to reduced rotavirus vaccine efficacy in developing countries.  
621 *PLoS Pathog* 16, e1009010.

622 Pabst, O., and Slack, E. (2020). IgA and the intestinal microbiota: the importance of  
623 being specific. *Mucosal Immunology* 13, 12-21.

624 Puligedda, R.D., Vigdorovich, V., Kouivaskaia, D., Kattala, C.D., Zhao, J.Y., Al-Saleem,  
625 F.H., Chumakov, K., Sather, D.N., and Dessain, S.K. (2020). Human IgA Monoclonal  
626 Antibodies That Neutralize Poliovirus, Produced by Hybridomas and Recombinant  
627 Expression. *Antibodies (Basel)* 9.

628 Ray, P.G., Kelkar, S.D., Walimbe, A.M., Biniwale, V., and Mehendale, S. (2007).  
629 Rotavirus immunoglobulin levels among Indian mothers of two socio-economic groups  
630 and occurrence of rotavirus infections among their infants up to six months. *J Med Virol*  
631 79, 341-349.

632 Reinhart, D., and Kunert, R. (2015). Upstream and downstream processing of  
633 recombinant IgA. *Biotechnol Lett* 37, 241-251.

634 Renegar, K.B., and Small, P.A. (1991a). Immunoglobulin A mediation of murine nasal  
635 anti-influenza virus immunity. *Journal of Virology* 65, 2146-2148.

636 Renegar, K.B., and Small, P.A. (1991b). Passive transfer of local immunity to influenza  
637 virus infection by IgA antibody. *The Journal of Immunology* 146, 1972-1978.

638 Renegar, K.B., Small, P.A., Jr., Boykins, L.G., and Wright, P.F. (2004). Role of IgA  
639 versus IgG in the control of influenza viral infection in the murine respiratory tract. *J*  
640 *Immunol* 173, 1978-1986.

641 Ruiz-Palacios, G.M., Calva, J.J., Pickering, L.K., Lopez-Vidal, Y., Volkow, P.,  
642 Pezzarossi, H., and West, M.S. (1990). Protection of breast-fed infants against  
643 *Campylobacter* diarrhea by antibodies in human milk. *The Journal of Pediatrics* 116,  
644 707-713.

645 Tô, T.L., Ward, L.A., Yuan, L., and Saif, L.J. (1998). Serum and intestinal isotype  
646 antibody responses and correlates of protective immunity to human rotavirus in a  
647 gnotobiotic pig model of disease. *J Gen Virol* 79 ( Pt 11), 2661-2672.

648 Torres, O., and Cruz, J.R. (1993). Protection against *Campylobacter* diarrhea: role of  
649 milk IgA antibodies against bacterial surface antigens. *Acta Paediatr* 82, 835-838.

650 Trang, N.V., Braeckman, T., Lernout, T., Hau, V.T., Anh le, T.K., Luan le, T., Van  
651 Damme, P., and Anh, D.D. (2014). Prevalence of rotavirus antibodies in breast milk and  
652 inhibitory effects to rotavirus vaccines. *Hum Vaccin Immunother* 10, 3681-3687.

653 Tuaille, E., Valea, D., Becquart, P., Al Tabaa, Y., Meda, N., Bollere, K., Van de Perre,  
654 P., and Vendrell, J.-P. (2009). Human Milk-Derived B Cells: A Highly Activated Switched  
655 Memory Cell Population Primed to Secrete Antibodies. *The Journal of Immunology* 182,  
656 7155-7162.

657 Velasquez, D.E., Parashar, U., and Jiang, B. (2018). Decreased performance of live  
658 attenuated, oral rotavirus vaccines in low-income settings: causes and contributing  
659 factors. *Expert Rev Vaccines* 17, 145-161.

660 Viridi, V., Juarez, P., Boudolf, V., and Depicker, A. (2016). Recombinant IgA production  
661 for mucosal passive immunization, advancing beyond the hurdles. *Cell Mol Life Sci* 73,  
662 535-545.

663 Xiong, E., Li, Y., Min, Q., Cui, C., Liu, J., Hong, R., Lai, N., Wang, Y., Sun, J.,  
664 Matsumoto, R., *et al.* (2019). MZB1 promotes the secretion of J-chain-containing  
665 dimeric IgA and is critical for the suppression of gut inflammation. 116, 13480-13489.

666 Zivanov, J., Nakane, T., Forsberg, B.O., Kimanius, D., Hagen, W.J., Lindahl, E., and  
667 Scheres, S.H. (2018). New tools for automated high-resolution cryo-EM structure  
668 determination in RELION-3. *eLife* 7.

669

670

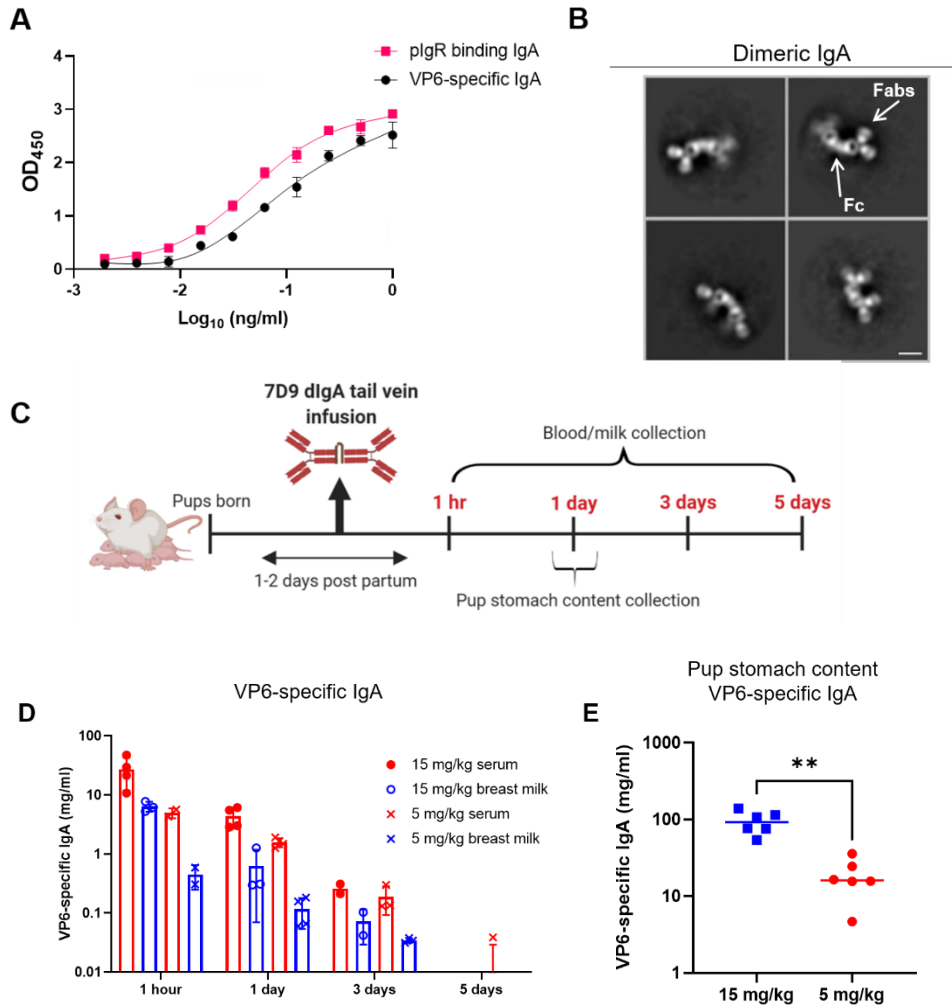

671

672 **Figure 1. Dimeric IgA antibodies administered systemically to lactating mice are**  
673 **transferred to milk and the stomach contents of suckling pups.** (A) The rotavirus  
674 (RV) VP6-specific, non-neutralizing 7D9 hybridoma derived antibodies bound to RV  
675 VP6 (black circles) and polymeric immunoglobulin receptor (pIgR; magenta squares) via  
676 ELISA. Data are plotted as mean  $\pm$  SD of replicates.  
677 (B) Negative stain electron microscopy representative images of the hybridoma-purified  
678 7D9 dimeric IgA (dIgA) antibodies. The Fab and Fc regions are indicated respectively.  
679 Scale bar represents 10 nm. (C) Schematic of tail vein injections of BALB/c lactating

680 dams given 5 mg/kg or 15 mg/kg 7D9 dIgA at 1 to 2 days postpartum. Blood and milk  
681 were collected from dams at 1 hr and 1, 3 and 5 days post injection. A subset of pups  
682 (n=6) per treatment group were sacrificed at 1-day post injection to collect their stomach  
683 content. The schematic was created with Biorender. (D) 7D9 antibodies were detected  
684 in blood and milk of injected dams at 1 hr and 1, 3 and 5 days post injection via a RV  
685 VP6-specific IgA antibody ELISA. The 5 mg/kg (x) and 15 mg/kg (triangle) treatment  
686 groups are indicated for serum (red) and milk (blue). Data are plotted as mean  $\pm$  SD  
687 and represent individual mice. (E) 7D9 antibodies were detected in the stomach content  
688 of suckling pups via a RV VP6-specific IgA antibody ELISA in a dose-dependent  
689 manner (5 mg/kg = red circles; 15 mg/kg = blue squares). Data are plotted as mean  $\pm$   
690 SD and represent individual pups. A significant difference between the compared  
691 groups (\*\*p < 0.01) was determined using a Mann-Whitney U test.

692

693

694

695

696

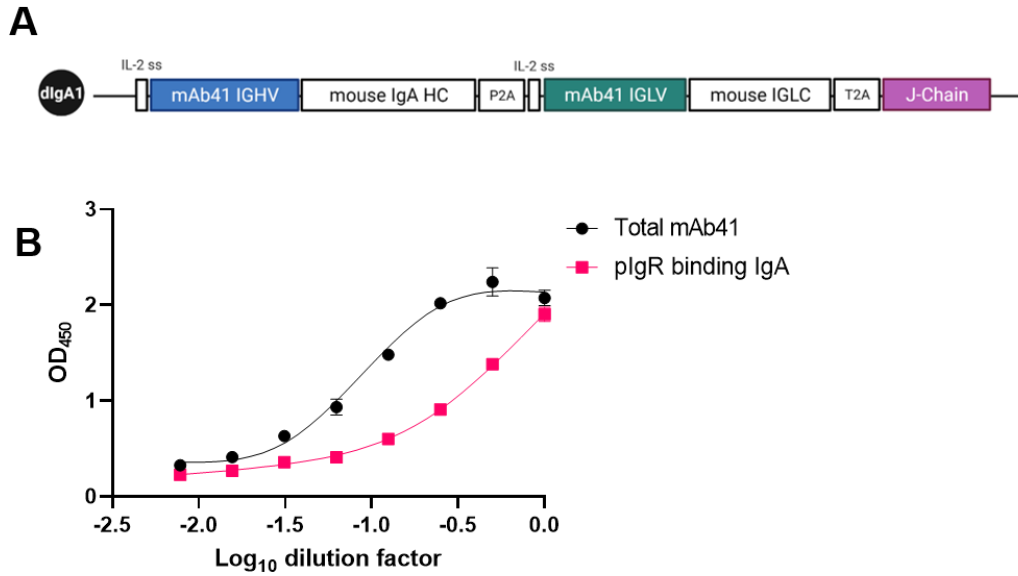

697

698 **Figure 2. Recombinant production of an RV-neutralizing mouse-human chimeric**  
699 **dIgA antibody.** (A) Schematic of the plasmid used to produce the mouse-human  
700 chimeric mAb41 dimeric IgA. The mAb41 immunoglobulin heavy chain variable (IGHV)  
701 gene (blue box), immunoglobulin light chain variable (IGLV) gene (green box), and the  
702 joining chain (J-chain) gene (purple box), are indicated in that order. Schematic created  
703 with Biorender. (B) J-chain containing IgA antibodies (mAb 41 = black circles) were  
704 detected via a polymeric immunoglobulin receptor (pIgR) binding ELISA. A positive  
705 control mAb (magenta squares) was included. Data are plotted as mean  $\pm$  SD of  
706 replicates.

707



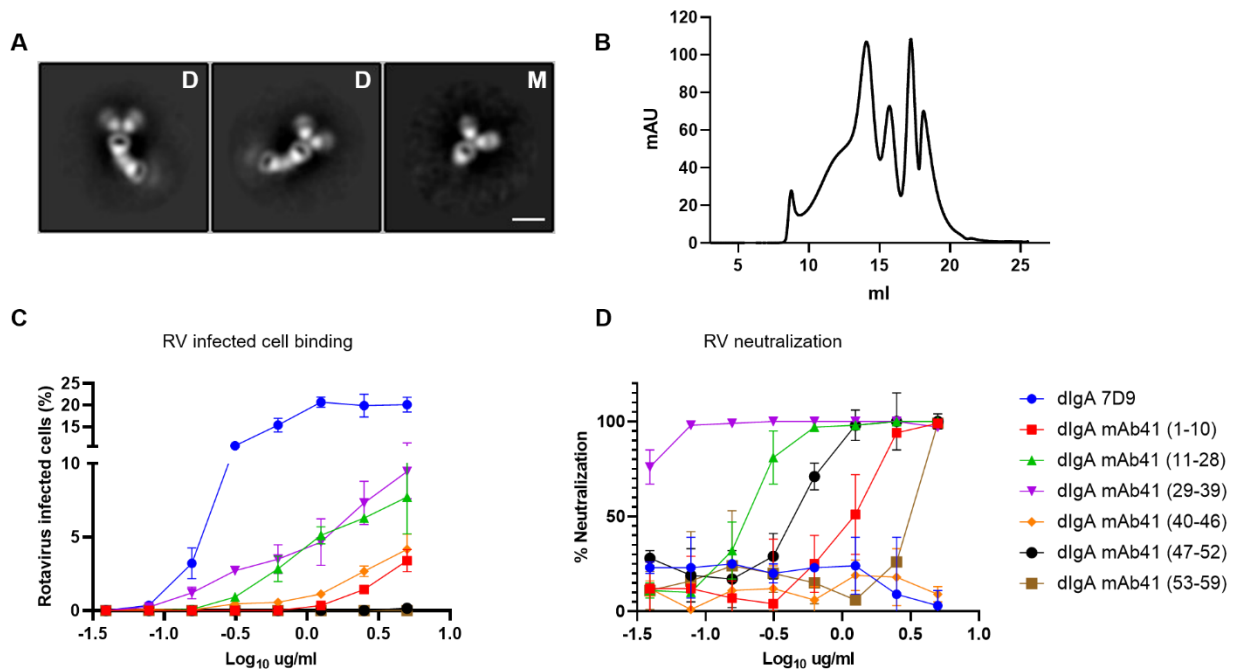

708

709 **Figure 3. Characterization of recombinant mAb41 IgA antibodies.**

710 (A) Representative negative stain electron microscopy images of purified dimeric (D)

711 and monomeric (M) mAb41 IgA antibodies. (B) Size exclusion chromatography using a

712 Superose 6 10/300 GL revealed multiple different peaks. Each of the peaks were

713 fractionated and the corresponding fractions (1-10, 11-28, 29-39, 40-46, 47-52 and 52-

714 59) functionally characterized by rotavirus (RV)-infected cell binding (C) and

715 neutralization assays (D). RV-infected MA104 cell binding assays revealed that fraction

716 29-39 bound the strongest to infected cells (C). Similarly, this fraction had the most

717 potent neutralization of RV as determined via RV neutralization assays (D). Based on

718 molecular mass this fraction contains dlG A. The non-neutralizing 7D9 dlG A (blue line)

719 was used as a positive control for binding and a negative control for neutralization. Data

720 are plotted as mean  $\pm$  SD of replicates.

721

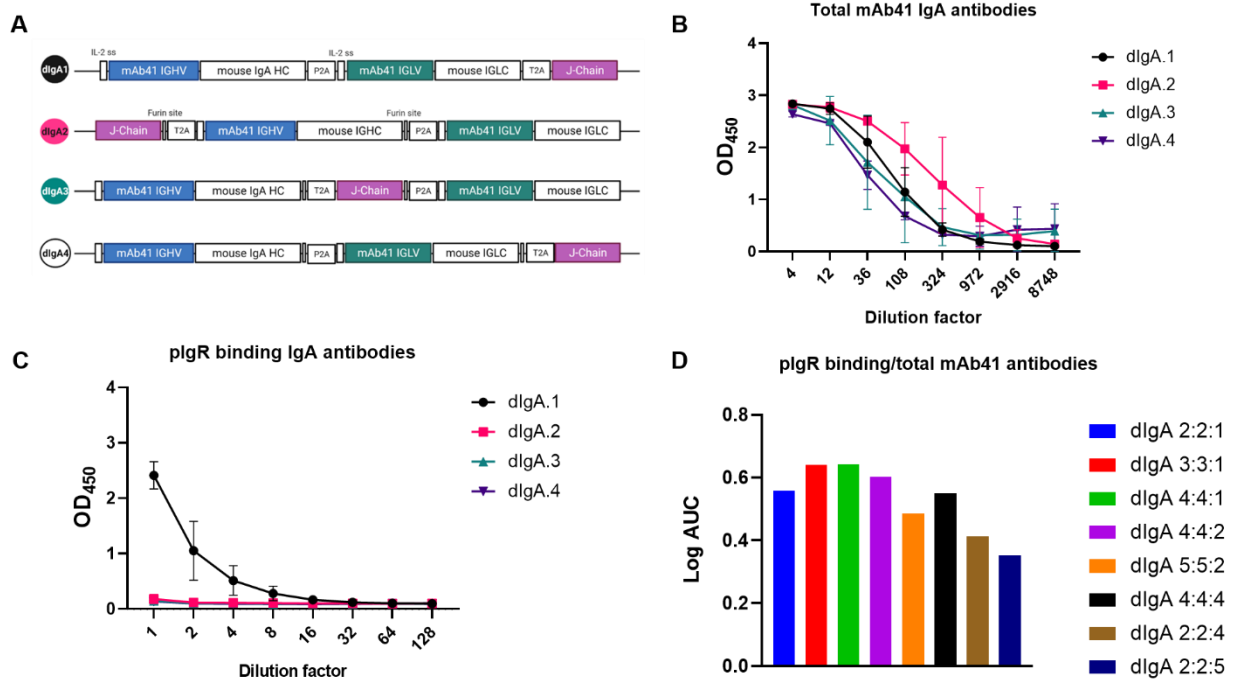

722

723 **Figure 4. Antibody chains position and ratio impacts the recombinant production**

724 **of RV-neutralizing mouse-human chimeric mAb41 dimeric IgA.** (A) Schematic of

725 the different constructs generated to determine if the position of the J-chain gene in the

726 plasmid cassette impacts dimeric IgA (dIgA) production. Illustration created with

727 Biorender. (B) All constructs produced high amounts of mAb41 IgA. However,

728 placement of the J-chain gene at the end of the plasmid cassette (dlgA.1) resulted in

729 the highest amount of pIgR binding IgA antibodies as determined by ELISA (C). Data

730 are plotted as mean  $\pm$  SD of experimental duplicates. (D) To determine the optimal ratio

731 of heavy light and J-chain for dimeric IgA production, we co-transfected three separate

732 plasmids each expressing either the heavy (H), the light (L) or the J-chain (J) in varying

733 amounts as depicted on the graph. pIgR IgA antibodies and total mAb41 IgA antibodies

734 were detected via ELISA. Log area under the curve (AUC) was calculated for each co-

735 transfection and graphed as a ratio of pIgR binding IgA antibodies over total mAb41 IgA

736 antibodies. Greater production of pIgR binding IgA antibodies was achieved when lower  
737 amounts of J-chain expressing plasmid were used compared to heavy and light chain  
738 plasmids. Data are plotted as mean  $\pm$  SD of experimental duplicates.

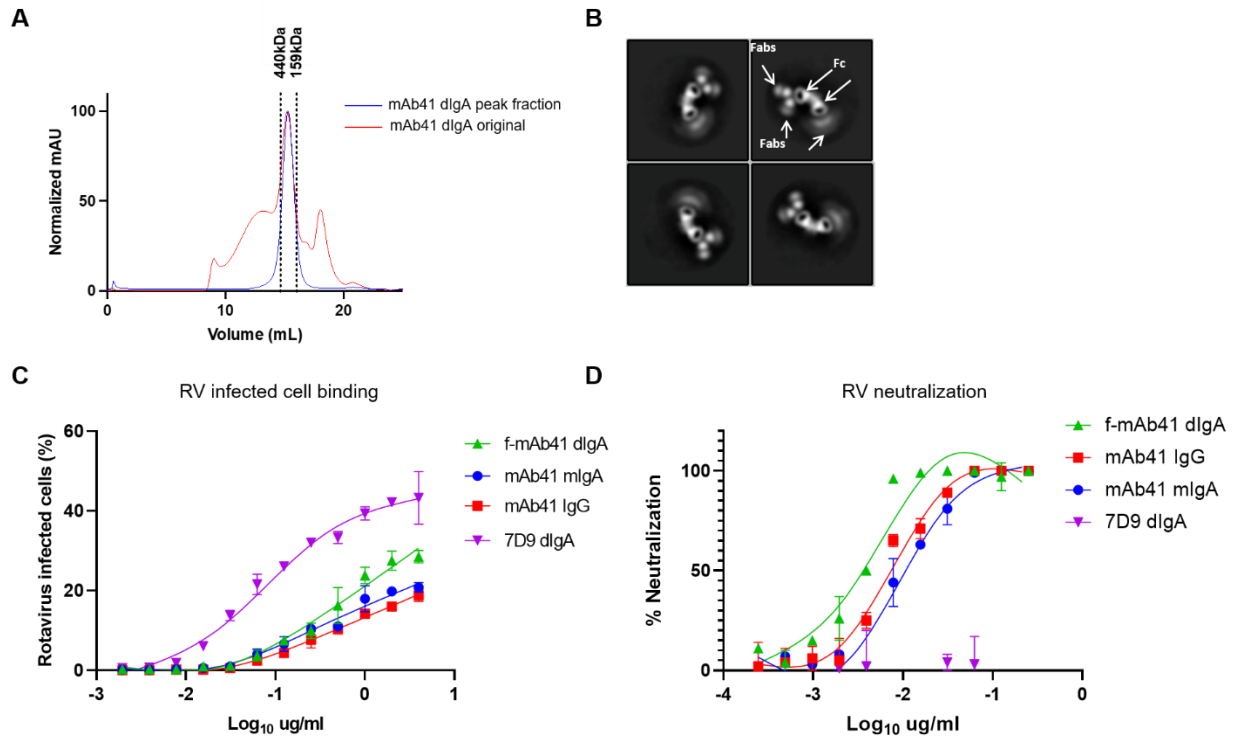

739

740 **Figure 5. Recombinant mAb41 dimeric IgA antibodies demonstrate greater**  
741 **rotavirus binding and neutralization potency than mAb41 monomeric IgA**  
742 **antibodies.** (A) Size exclusion chromatography by Superose 6 Increase 10/300 GL  
743 column in 1XPBS of mAb41 dimeric IgA (dlGA) antibodies at a flow rate of 0.75 ml/min.  
744 Molecular weight markers are listed above the dashed lines at 440kDa and 158kDa,  
745 respectively. (B) Negative stain electron microscopy of the purified fraction revealed  
746 only the presence of dimeric antibodies. Fab and Fc regions are indicated respectively  
747 by white arrows. (C) Fractionated mAb41 dimeric IgA (f-mAb41 dlGA) antibodies bound  
748 stronger to RV infected cells compared to mAb41 monomeric IgA (mlgA) or IgG as  
749 determined by a RV infected cell binding assay. Data are plotted as mean  $\pm$  SD of  
750 replicates. (D) Fractionated mAb41 dimeric IgA (f-mAb41 dlGA) antibodies more  
751 potently neutralized RV compared to mAb41 monomeric IgA (mlgA) or IgG as  
752 determined by a RV neutralization assay. Data are plotted as mean  $\pm$  SD of replicates.

753

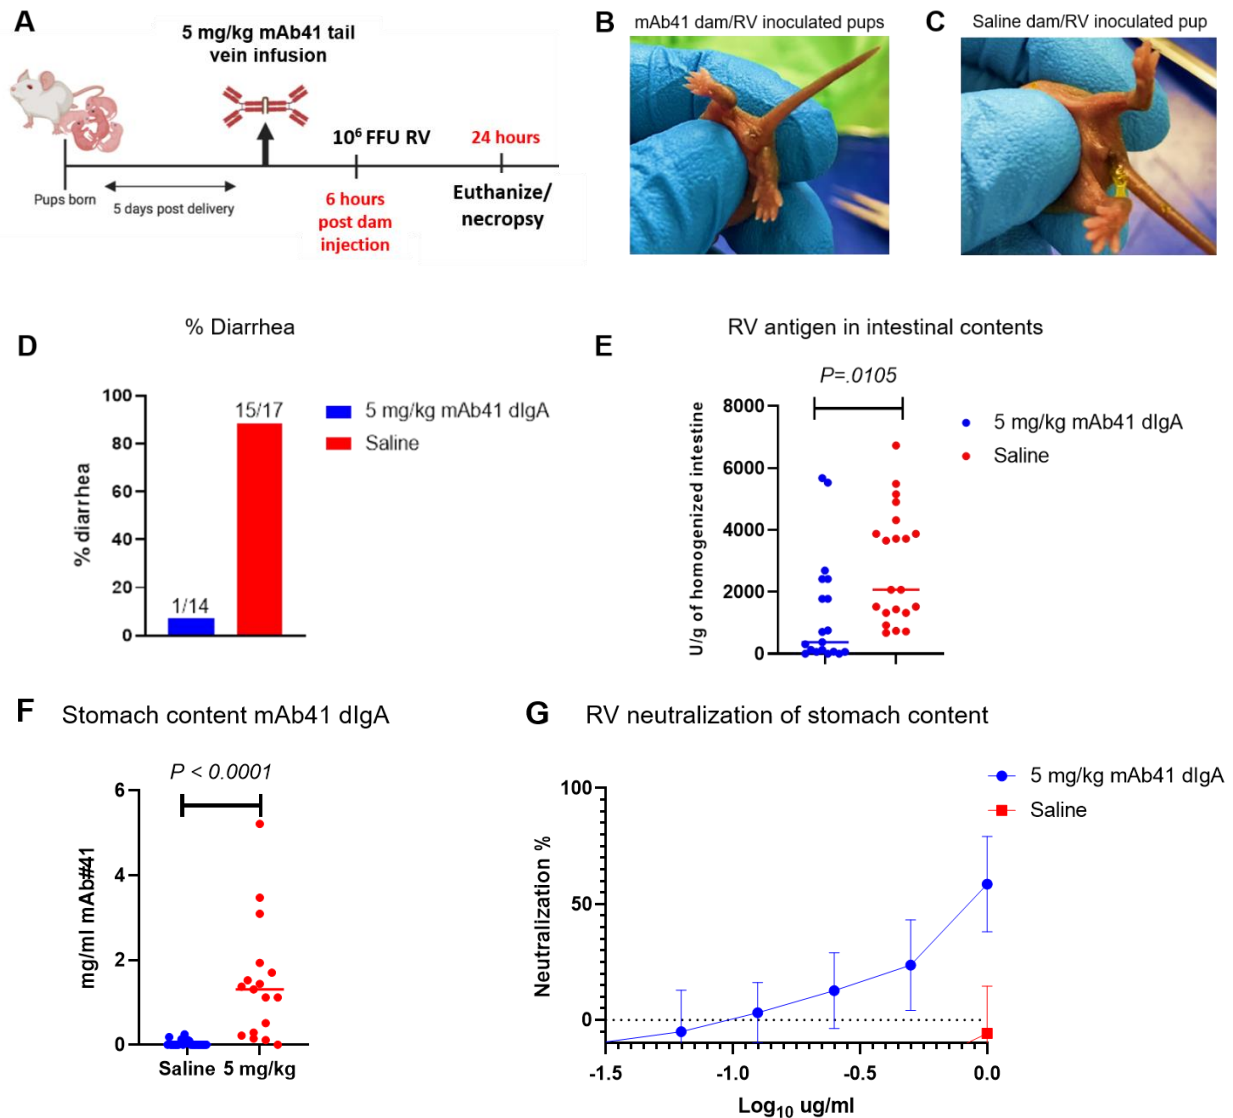

754

755 **Figure 6. Passive maternal immunization with systemic mAb41 dIgA protects**  
756 **against rotavirus (RV)-induced diarrhea in suckling pups.** (A) Schematic of tail vein  
757 injections of BALB/c lactating dams with 5mg/kg f-dIgA mAb41 antibodies at 5 days  
758 postpartum. Pups were orally inoculated with 1×10<sup>6</sup> FFU of RV (Wa strain) at 6 hrs post  
759 dam injection and euthanized 24 hrs later. Schematic created with Biorender. (B)  
760 Representative image of RV inoculated suckling pups from f-dIgA mAb41 infused dams,

761 which excreted urine or hard stool upon abdomen gentle palpation. (C) Representative  
762 image of RV inoculated suckling pups from saline infused dams, which excreted yellow,  
763 liquid and/or stick stool after gentle abdomen palpation. (D) Diarrhea was reported as %  
764 of animals with clinical symptoms upon gentle abdomen palpation in each treatment  
765 group (5 mg/kg = blue; saline = red). The number of animals with diarrhea out of the  
766 total number of animals are reported at the top of each bar graph. (E) RV antigen in  
767 homogenized intestinal tissue was detected via a commercial RV antigen binding  
768 ELISA. Data are plotted as individual values for each animal and the horizontal bar  
769 represents the median units of RV antigen per gram of homogenized intestinal tissue.  
770 Significant differences between the compared groups were determined using a Mann-  
771 Whitney U test (\*\*p < 0.05). (F) mAb41 antibodies were detected in stomach content of  
772 suckling pups using an mAb41 anti-idiotypic IgA antibody ELISA. Data are plotted as  
773 individual values for each animal and the horizontal bar represents the median ng/ml of  
774 mAb41 IgA antibodies. Significant differences between the compared groups were  
775 determined using a Mann-Whitney U test (\*\*p < 0.001). (G) Stomach content was  
776 assessed for rotavirus neutralization at different dilutions and plotted as neutralization %  
777 in n=6 pups per treatment group (5 mg/kg = blue; saline = red). Data are plotted as the  
778 mean  $\pm$  SD.
